# Supplementary material
Source: HighWire-hosted journal article supplement (https://bmjopen.bmj.com/content/12/2/e051694)
Supplement: inline-supplementary-material-1 [file inline-supplementary-material-1.pdf]

**Supplementary table S1.****Tab.S1** Risk of bias assessment for studies included.

| Study                          | 1 | 2 | 3 | 4 | 5 | 6 | 7 | 8 | 9 | 10 | 11 | Total score |
|--------------------------------|---|---|---|---|---|---|---|---|---|----|----|-------------|
| Li et al. <sup>[25]</sup>      | Y | N | Y | Y | U | Y | N | Y | N | N  | N  | 5           |
| Dalgard et al. <sup>[34]</sup> | Y | Y | Y | Y | U | Y | Y | Y | Y | Y  | N  | 8           |
| Ge et al. <sup>[26]</sup>      | Y | Y | Y | Y | U | Y | Y | Y | N | Y  | N  | 8           |
| Xue et al. <sup>[27]</sup>     | Y | N | N | Y | U | Y | Y | N | N | Y  | N  | 5           |
| Yang et al. <sup>[18]</sup>    | Y | Y | Y | Y | U | Y | Y | Y | N | Y  | N  | 8           |
| Ni et al. <sup>[28]</sup>      | Y | Y | Y | Y | U | Y | N | N | N | Y  | N  | 6           |
| Zhang et al. <sup>[29]</sup>   | Y | Y | Y | Y | U | Y | N | N | N | Y  | N  | 6           |
| Li et al. <sup>[30]</sup>      | Y | Y | N | Y | U | Y | N | N | N | Y  | N  | 5           |
| Wu et al. <sup>[31]</sup>      | Y | Y | Y | Y | U | Y | N | N | N | Y  | N  | 6           |
| Yang et al. <sup>[32]</sup>    | Y | Y | Y | Y | U | Y | Y | Y | N | Y  | N  | 8           |
| Tseng et al. <sup>[35]</sup>   | Y | N | Y | Y | U | Y | Y | Y | N | Y  | Y  | 7           |
| Chen et al. <sup>[19]</sup>    | Y | Y | Y | Y | U | Y | Y | N | N | Y  | N  | 7           |
| Hou et al. <sup>[33]</sup>     | Y | Y | Y | Y | U | Y | Y | N | N | Y  | N  | 7           |
| Miller et al. <sup>[36]</sup>  | Y | Y | Y | Y | U | Y | Y | Y | N | Y  | N  | 8           |
| Kara et al. <sup>[37]</sup>    | Y | Y | Y | Y | U | Y | Y | N | N | Y  | N  | 7           |
| Cowdell et al. <sup>[38]</sup> | Y | Y | Y | Y | U | Y | Y | N | N | Y  | N  | 7           |
| Dyhre et al. <sup>[39]</sup>   | Y | Y | Y | Y | U | Y | Y | N | Y | Y  | N  | 8           |

Y=YES; N= NO; U=Unclear; Score of Item (point): 1. Define the source of information (survey, record review); 2. List inclusion and exclusion criteria for exposed and unexposed subjects (cases and controls) or refer to previous publications; 3. Indicate time period used for identifying patients; 4. Indicate whether or not subjects were consecutive if not population-based; 5. Indicate if evaluators of subjective components of study were masked to other aspects of the status of the participants; 6. Describe any assessments undertaken for quality assurance purposes (e.g., test/retest of primary outcome measurements); 7. Explain any patient exclusions from analysis; 8. Describe how confounding was assessed and/or controlled; 9. If applicable, explain how missing data were handled in the analysis; 10. Summarize patient response rates and completeness of data collection; 11. Clarify what follow-up, if any, was expected and the percentage of patients for which incomplete data or follow-up was obtained.
