# Supplementary material
Source: HighWire-hosted journal article supplement (https://bmjopen.bmj.com/content/12/2/e051694)
Supplement: inline-supplementary-material-2 [file inline-supplementary-material-2.pdf]

**Pubmed**

- 1、 "Aged"[Mesh]
- 2、 "Aging"[Mesh]
- 3、 "geriatrics"[Mesh]
- 4、 (((((((((((((Aging[Title/Abstract]) OR aged[Title/Abstract]) OR senior old[Title/Abstract]) OR geriatric[Title/Abstract]) OR elder[Title/Abstract]) OR old age[Title/Abstract]) OR pensioner[Title/Abstract]) OR veteran older adult\*[Title/Abstract]) OR older people[Title/Abstract]) OR older person\*[Title/Abstract]) OR older patient\*[Title/Abstract]) OR older women[Title/Abstract]) OR older men[Title/Abstract]) OR geriatrics[Title/Abstract]) OR senile[Title/Abstract]) OR senility[Title/Abstract]
- 5、 #1 or #2 or #3 or #4
- 6、 "Pruritus"[Mesh]
- 7、 (((((((((Pruritus[Title/Abstract]) OR Pruritis[Title/Abstract]) OR skin pruritus[Title/Abstract]) OR Itching[Title/Abstract]) OR Skin disorders[Title/Abstract]) OR Dermatological problems[Title/Abstract]) OR skin diseases[Title/Abstract]) OR Senile Pruritus[Title/Abstract]) OR chronic pruritus[Title/Abstract]
- 8、 #6 or #7
- 9、 "Incidence"[Mesh]
- 10、 "Prevalence"[Mesh]
- 11、 "Epidemiology"[Mesh]
- 12、 (((((((((Epidemiology[Title/Abstract]) OR Prevalence[Title/Abstract]) OR Incidence[Title/Abstract]) OR Incidences[Title/Abstract]) OR Incidence Studies[Title/Abstract]) OR Prevalences[Title/Abstract]) OR Prevalence Studies[Title/Abstract]) OR Epidemiologic Studies[Title/Abstract]
- 13、 #9 or #10 or #11 or #12
- 14、 "Risk Factors"[Mesh]
- 15、 "Risk"[Mesh]
- 16、 "Root Cause Analysis"[Mesh]

17、 ((Risk Factors[Title/Abstract]) OR Risk[Title/Abstract]) OR Root Cause Analysis[Title/Abstract]

18、 #14 or #15 or #16 or #17

19、 #13 or #18

20、 #5 AND #8 AND #19

### **Web of Science**

1、 TI=(aged or aging or older adult\* or older people or older person\* or older patient\* or older women or older men)

2、 TI= (geriatric or geriatrics or elder\* or senile or senility or senior or old age or old or elder or pensioner or veteran).tw.

3、 1 or 2

4、 TS=(Pruritus or Pruritis or skin pruritus or Itching or Skin disorders or Dermatological problems or skin diseases or Senile Pruritus or f chronic pruritus)

5、 TS=( Prevalence Prevalences or Prevalence Studies or Risk Factors or Root Cause Analysis)

6、 3 and 4 and 5

### **Embase**

1、 exp Aged/

2、 exp Aging/

3、 exp Geriatrics/

4、 (aged or aging or older adult\* or older people or older person\* or older patient\* or older women or older men).tw.

5、 (geriatric or geriatrics or elder\* or senile or senility or senior or old age or old or elder or pensioner or veteran).tw.

6、 1 or 2 or 3 or 4 or 5

- 7、 exp Pruritus/
- 8、 (Pruritus or Pruritis or skin pruritus or Itching or Skin disorders or Dermatological problems or skin diseases or Senile Pruritus or f chronic pruritus).tw.
- 9、 7 or 8
- 10、 exp Prevalence/
- 11、 exp Risk Factor/
- 12、 exp Root Cause Analysis/
- 13、 ( Prevalence Prevalences or Prevalence Studies).tw.
- 14、 (Risk Factors or Root Cause Analysis).tw.
- 15、 10 or 11 or 12 or 13 or 14
- 16、 6 and 9 and 15

#### **CINAHL**

- 1、 (MH "Aged+") OR (MH "Aging+") OR (MH "geriatrics+")
- 2、 AB aged or aging or geriatrics or senior or old or geriatric or elder or old age or pensioner or veteran or older adult\* or older people or older person\* or older patient\* or older women or older men or senile or senility
- 3、 S1 OR S2
- 4、 (MH "Pruritus+")
- 5、 AB Pruritus or Pruritis or skin pruritus or Itching or Skin disorders or Dermatological problems or skin diseases or Senile Pruritus or chronic pruritus
- 6、 S4 OR S5
- 7、 (MH "Prevalence+") OR (MH "Risk Factors+") OR (MH "Root Cause Analysis+")
- 8、 AB Prevalence or Prevalences or Prevalence Studies or Risk Factor or Root Cause Analysis

9、 S7 OR S8

10、 S3 AND S6 AND S9

### **Cochrane Library**

- 1、 MeSH descriptor: [Aged] in all MeSH products
- 2、 MeSH descriptor: [Aging] explode all trees
- 3、 MeSH descriptor: [Geriatrics] explode all trees
- 4、 (Aging):ti,ab,kw OR (aged):ti,ab,kw OR (Geriatrics):ti,ab,kw OR (senior):ti,ab,kw OR (old):ti,ab,kw
- 5、 (geriatric):ti,ab,kw OR (elder):ti,ab,kw OR (old age):ti,ab,kw OR (pensioner):ti,ab,kw OR (veteran):ti,ab,kw
- 6、 (older adult\*):ti,ab,kw OR (older people):ti,ab,kw OR (older person\*):ti,ab,kw OR (older patient\*):ti,ab,kw OR (older women):ti,ab,kw
- 7、 (older men):ti,ab,kw OR (senile):ti,ab,kw OR (senility):ti,ab,kw
- 8、 #1 or #2 #3 or #4 or #5 or #6 or #7
- 9、 MeSH descriptor: [Pruritus] explode all trees
- 10、 (pruritus):ti,ab,kw OR (pruritis):ti,ab,kw OR (skin pruritus):ti,ab,kw OR (Itching):ti,ab,kw OR (Skin disorders):ti,ab,kw
- 11、 (Dermatological problems):ti,ab,kw OR (skin diseases):ti,ab,kw OR (Senile Pruritus):ti,ab,kw OR (chronic pruritus):ti,ab,kw
- 12、 #9 or #10 or #11
- 13、 MeSH descriptor: [Prevalence] explode all trees
- 14、 MeSH descriptor: [Risk Factors] explode all trees
- 15、 MeSH descriptor: [Root Cause Analysis] explode all trees
- 16、 (Prevalence):ti,ab,kw OR (Prevalences):ti,ab,kw
- 17、 (Risk Factors):ti,ab,kw OR (Root Cause Analysis):ti,ab,kw
- 18、 #13 or #14 #15 or #16 or #17
- 19、 #8 and #12 and #18

**CNKI**

AB = ('老人'+ '老年'+ '老年人') AND AB = ('瘙痒性皮肤病'+ '瘙痒症'+ '老年性皮肤瘙痒'+ '老年性皮肤瘙痒症'+ '搔痒'+ '瘙痒') AND AB = ('发病率'+ '发病率研究'+ '患病率'+ '现患调查'+ '流行病学研究'+ '流行病学'+ '风险关系'+ '危险因素'+ '危险'+ '影响因素'+ '影响因素分析'+ '相关因素'+ '现况调查'+ '相关性研究'+ '相关因素分析'+ '影响')

**Wanfang**

(老年+老人+老年人) \* (瘙痒性皮肤病+瘙痒+瘙痒症+老年性皮肤瘙痒+老年性皮肤瘙痒症+搔痒) \* (发病率+发病率研究+患病率+现患调查+流行病学研究+流行病学+风险关系+危险因素+危险+影响因素+相关因素+现况调查+相关性研究+相关因素分析+影响)

**VIP**

(U=老人 OR U=老年 OR U=老年人) AND (U=瘙痒性皮肤病 OR U=瘙痒 OR U=瘙痒症 OR U=老年性皮肤瘙痒 OR U=老年性皮肤瘙痒症 OR U=搔痒) AND (U=发病率 OR U=发病率研究 OR U=患病率 OR U=现患调查 OR U=流行病学研究 OR U=流行病学 OR U=风险关系 OR U=危险因素 OR U=危险 OR U=影响因素 OR U=影响因素分析 OR U=相关因素 OR U=现况调查 OR U=相关性研究 OR U=相关因素分析 OR U=影响)

**CBM**

- 1、"老年人"[不加权:扩展]
- 2、"老年人"[常用字段:智能] OR "老人"[常用字段:智能] OR "老年"[常用字段:智能]
- 3、(#1) OR (#2)

- 4、"瘙痒症"[不加权:扩展]
- 5、"瘙痒性皮肤病"[摘要:智能] OR "瘙痒"[摘要:智能] OR "瘙痒症"[摘要:智能] OR "老年性皮肤瘙痒"[摘要:智能] OR "老年性皮肤瘙痒症"[摘要:智能] OR "搔痒"[摘要:智能]
- 6、(#4) OR (#5)
- 7、"患病率"[不加权:扩展]
- 8、"横断面研究"[不加权:扩展]
- 9、"队列研究"[不加权:扩展]
- 10、"流行病学研究"[不加权:扩展]
- 11、"流行病学"[不加权:扩展]
- 12、"影响因素分析"[不加权:扩展]
- 13、"危险因素"[不加权:扩展]
- 14、"危险"[不加权:扩展]
- 15、"发病率"[常用字段:智能] OR "发病率研究"[常用字段:智能] OR "患病率"[常用字段:智能] OR "现患调查"[常用字段:智能] OR "流行病学研究"[常用字段:智能] OR "流行病学"[常用字段:智能] OR "现况调查"[常用字段:智能] OR "相关性研究"[常用字段:智能] OR "相关因素分析"[常用字段:智能]
- 16、"影响"[常用字段:智能] OR "风险关系"[常用字段:智能] OR "危险因素"[常用字段:智能] OR "危险"[常用字段:智能] OR "影响因素"[常用字段:智能] OR "影响因素分析"[常用字段:智能] OR "相关因素"[常用字段:智能]
- 17、(#7-16)
- 18、(#3) AND (#6) AND (#17)
